# Supplementary material for: A Machine Learning Approach to Study Glycosidase Activities from Bifidobacterium
Source: MDPI journal article supplement (doi:10.3390/microorganisms9051034), 2021-05-11
Supplement: s1 [file s1]

**Table S1.** Number of metagenome-assembled genomes (MAGs) recovered (n=1806) per species and strains identified (n=177).

| Taxonomic identification                    | Number of MAGs | Taxonomic identification                 | Number of MAGs |
|---------------------------------------------|----------------|------------------------------------------|----------------|
| <i>Escherichia coli</i>                     | 140            | <i>Lachnospiraceae bacterium KM106-2</i> | 7              |
| <i>Faecalibacterium prausnitzii</i>         | 116            | <i>Phascolarctobacterium faecium</i>     | 7              |
| <i>Ruminococcus gnavus</i>                  | 114            | <i>Prevotella dentalis</i>               | 7              |
| <i>Collinsella aerofaciens</i>              | 71             | <i>Ruminococcus albus</i>                | 7              |
| <i>Bifidobacterium longum</i>               | 70             | <i>Alistipes onderdonkii</i>             | 6              |
| <i>Veillonella parvula</i>                  | 62             | <i>Bacteroides vulgatus</i>              | 6              |
| <i>Akkermansia muciniphila</i>              | 59             | <i>Clostridium saccharolyticum</i>       | 6              |
| <i>Lachnospiraceae bacterium GAM79</i>      | 50             | <i>Haemophilus parainfluenzae</i>        | 6              |
| <i>Ruthenibacterium lactatiformans</i>      | 46             | <i>Lactococcus lactis</i>                | 6              |
| <i>Bifidobacterium bifidum</i>              | 39             | <i>Muribaculum sp. TLL-A4</i>            | 6              |
| <i>Bifidobacterium breve</i>                | 38             | <i>Roseburia hominis</i>                 | 6              |
| <i>Blautia sp. SC05B48</i>                  | 38             | <i>Veillonella rodentium</i>             | 6              |
| <i>Clostridium bolteae</i>                  | 36             | <i>Alistipes communis</i>                | 5              |
| <i>Bifidobacterium pseudocatenulatum</i>    | 35             | <i>Alistipes shahii</i>                  | 5              |
| <i>Faecalitalea cylindroides</i>            | 35             | <i>Bacteroides fragilis</i>              | 5              |
| <i>Ruminococcus sp. JE7A12</i>              | 32             | <i>Eggerthella lenta</i>                 | 5              |
| <i>Parabacteroides distasonis</i>           | 27             | <i>Streptococcus thermophilus</i>        | 5              |
| <i>Ruminococcus bicirculans</i>             | 26             | <i>Turicibacter sp. H121</i>             | 5              |
| <i>Lachnoclostridium sp. YL32</i>           | 25             | <i>Abssiella sp. 9CBEGH2</i>             | 4              |
| <i>Longibaculum sp. KGMB06250</i>           | 25             | <i>Barnesiella viscericola</i>           | 4              |
| <i>Abssiella argi</i>                       | 23             | <i>Butyrivibrio fibrisolvens</i>         | 4              |
| <i>Anaerostipes hadrus</i>                  | 22             | <i>Clostridioides difficile</i>          | 4              |
| <i>Prevotella ruminicola</i>                | 22             | <i>Enterococcus avium</i>                | 4              |
| <i>Flavonifractor plautii</i>               | 21             | <i>Paraprevotella xylaniphila</i>        | 4              |
| <i>Lachnospira eligens</i>                  | 21             | <i>Sutterella faecalis</i>               | 4              |
| <i>Lachnospiraceae bacterium</i>            | 20             | <i>Burkholderiales bacterium YL45</i>    | 3              |
| <i>Caproiciproducens sp. NJN-50</i>         | 19             | <i>Clostridium butyricum</i>             | 3              |
| <i>Veillonella atypica</i>                  | 19             | <i>Clostridium cellulosi</i>             | 3              |
| <i>Veillonella dispar</i>                   | 18             | <i>Dialister pneumosintes</i>            | 3              |
| <i>Bifidobacterium adolescentis</i>         | 17             | <i>Flintibacter sp. KGMB00164</i>        | 3              |
| <i>Clostridium sp. enoides</i>              | 17             | <i>Klebsiella aerogenes</i>              | 3              |
| <i>Ruminococcus champanellensis</i>         | 17             | <i>Lachnoclostridium phocaeense</i>      | 3              |
| <i>Blautia sp. N6H1-15</i>                  | 16             | <i>Ligilactobacillus ruminis</i>         | 3              |
| <i>Lachnospiraceae bacterium Choco86</i>    | 16             | <i>Megamonas funiformis</i>              | 3              |
| <i>Enterococcus faecalis</i>                | 15             | <i>Methanobrevibacter smithii</i>        | 3              |
| <i>Erysipelotrichaceae bacterium GAM147</i> | 15             | <i>Prevotella intermedia</i>             | 3              |
| <i>Clostridium perfringens</i>              | 14             | <i>Actinomyces pacaensis</i>             | 2              |
| <i>Megasphaera elsdenii</i>                 | 13             | <i>Alistipes dispar</i>                  | 2              |
| <i>Blautia producta</i>                     | 13             | <i>Alistipes finegoldii</i>              | 2              |
| <i>Bacteroides uniformis</i>                | 12             | <i>Bacillus sp. SB49</i>                 | 2              |
| <i>Klebsiella pneumoniae</i>                | 12             | <i>Bifidobacterium dentium</i>           | 2              |
| <i>Lacticaseibacillus rhamnosus</i>         | 11             | <i>Brachyspira pilosicoli</i>            | 2              |
| <i>Streptococcus sp. HSISS3</i>             | 11             | <i>Citrobacter freundii</i>              | 2              |
| <i>Roseburia intestinalis</i>               | 9              | <i>Citrobacter koseri</i>                | 2              |
| <i>Streptococcus salivarius</i>             | 9              | <i>Clostridium hylemonae</i>             | 2              |
| <i>Bacteroides thetaiotaomicron</i>         | 8              | <i>Clostridium scindens</i>              | 2              |
| <i>Enterococcus sp. HSIEG1</i>              | 8              | <i>Clostridium sp. CT4</i>               | 2              |
| <i>Oscillibacter valericigenes</i>          | 8              | <i>Enterobacter hormaechei</i>           | 2              |
| <i>Phascolarctobacterium succinatutens</i>  | 8              | <i>Eubacterium limosum</i>               | 2              |
| <i>Streptococcus lutetiensis</i>            | 8              | <i>Faecalibaculum rodentium</i>          | 2              |

**Table S1. Cont.**

| <b>Taxonomic identification</b>          | <b>Number of MAGs</b> | <b>Taxonomic identification</b>       | <b>Number of MAGs</b> |
|------------------------------------------|-----------------------|---------------------------------------|-----------------------|
| <i>Klebsiella michiganensis</i>          | 2                     | <i>Lentilactobacillus hilgardii</i>   | 1                     |
| <i>Klebsiella oxytoca</i>                | 2                     | <i>Limosilactobacillus reuteri</i>    | 1                     |
| <i>Muribaculaceae bacterium DSM</i>      | 2                     | <i>Lactobacillus terrae</i>           | 1                     |
| <i>Selenomonas sp. oral</i>              | 2                     | <i>Leuconostoc lactis</i>             | 1                     |
| <i>Serratia marcescens</i>               | 2                     | <i>Mageeibacillus indolicus</i>       | 1                     |
| <i>Staphylococcus epidermidis</i>        | 2                     | <i>Megasphaera stantonii</i>          | 1                     |
| <i>Succinivibrio dextrinosolvens</i>     | 2                     | <i>Microbacterium aurum</i>           | 1                     |
| <i>Weissella confusa</i>                 | 2                     | <i>Microbacterium hominis</i>         | 1                     |
| <i>Acetobacterium woodii</i>             | 1                     | <i>Neorhizobium galegae</i>           | 1                     |
| <i>Actinomyces sp. oral</i>              | 1                     | <i>Olsenella sp. GAM18</i>            | 1                     |
| <i>Alistipes megaguti</i>                | 1                     | <i>Paenibacillus sabinae</i>          | 1                     |
| <i>Aminipila butyrica</i>                | 1                     | <i>Prevotella denticola</i>           | 1                     |
| <i>Anaerostipes rhamnosivorans</i>       | 1                     | <i>Pseudobutyrvibrio xylanivorans</i> | 1                     |
| <i>Bacillus megaterium</i>               | 1                     | <i>Rathayibacter sp. VKM</i>          | 1                     |
| <i>Bacillus thuringiensis</i>            | 1                     | <i>Rhizobium sp. NXC24</i>            | 1                     |
| <i>Bacteroides coprosuis</i>             | 1                     | <i>Serratia liquefaciens</i>          | 1                     |
| <i>Bacteroides ovatus</i>                | 1                     | <i>Streptococcus gallolyticus</i>     | 1                     |
| <i>Bacteroides salanitronis</i>          | 1                     | <i>Streptococcus sp. HSISM1</i>       | 1                     |
| <i>Bacteroides xylanisolvens</i>         | 1                     | <i>Streptococcus sp. HSISS2</i>       | 1                     |
| <i>Bifidobacterium catenulatum</i>       | 1                     | <i>Streptococcus sp. LPB0220</i>      | 1                     |
| <i>Bifidobacterium scardovii</i>         | 1                     | <i>Streptococcus vestibularis</i>     | 1                     |
| <i>Bradyrhizobium erythrophlei</i>       | 1                     | <i>Streptomyces qinzhouensis</i>      | 1                     |
| <i>Brevibacillus agri</i>                | 1                     | <i>Streptomyces sp. 769</i>           | 1                     |
| <i>Burkholderia cenocepacia</i>          | 1                     | <i>Streptomyces sp. S4.7</i>          | 1                     |
| <i>Burkholderia multivorans</i>          | 1                     | <i>Streptomyces sp. Sge12</i>         | 1                     |
| <i>Butyrivibrio hungatei</i>             | 1                     | <i>Sutterella megalosphaeroides</i>   | 1                     |
| <i>Butyrivibrio proteoclasticus</i>      | 1                     | <i>Virgibacillus phasianinus</i>      | 1                     |
| <i>Cellulomonas sp. Z28</i>              | 1                     |                                       |                       |
| <i>Citrobacter portucalensis</i>         | 1                     |                                       |                       |
| <i>Citrobacter sp. CFNIH10</i>           | 1                     |                                       |                       |
| <i>Clostridiales bacterium CCNA10</i>    | 1                     |                                       |                       |
| <i>Clostridium botulinum</i>             | 1                     |                                       |                       |
| <i>Clostridium saccharobutylicum</i>     | 1                     |                                       |                       |
| <i>Clostridium sp. BNL1100</i>           | 1                     |                                       |                       |
| <i>Clostridium sp. JN-9</i>              | 1                     |                                       |                       |
| <i>Corynebacterium epidermidicanis</i>   | 1                     |                                       |                       |
| <i>Corynebacterium sp. 2184</i>          | 1                     |                                       |                       |
| <i>Corynebacterium stationis</i>         | 1                     |                                       |                       |
| <i>Cutibacterium avidum</i>              | 1                     |                                       |                       |
| <i>Dialister hominis</i>                 | 1                     |                                       |                       |
| <i>Dialister massiliensis</i>            | 1                     |                                       |                       |
| <i>Eggerthella sp. YY7918</i>            | 1                     |                                       |                       |
| <i>Enterococcus casseliflavus</i>        | 1                     |                                       |                       |
| <i>Erysipelotrichaceae bacterium I46</i> | 1                     |                                       |                       |
| <i>Ethanoligenens harbinense</i>         | 1                     |                                       |                       |
| <i>Finegoldia magna</i>                  | 1                     |                                       |                       |
| <i>Intestinibaculum porci</i>            | 1                     |                                       |                       |
| <i>Klebsiella variicola</i>              | 1                     |                                       |                       |
| <i>Lachnospiraceae bacterium oral</i>    | 1                     |                                       |                       |
| <i>Companilactobacillus futsaii</i>      | 1                     |                                       |                       |

**Table S2.** Number of metagenome-assembled genomes (**MAGs**) recovered per diet type. **GOS**: galacto-oligosaccharides, **FOS**: fructo-oligosaccharides.

| <b>Number of MAGs per diet type considering all species identified</b> |                       |
|------------------------------------------------------------------------|-----------------------|
| <b>Taxonomic identification</b>                                        | <b>Number of MAGs</b> |
| Infant formula-fed (infant)                                            | 638                   |
| Fiber-rich (adult)                                                     | 467                   |
| Infant formula-fed + GOS (infant)                                      | 281                   |
| Breast-fed (infant)                                                    | 144                   |
| Infant formula-fed + FOS (infant)                                      | 106                   |
| Infant formula-fed + GOS + FOS (infant)                                | 84                    |
| Breast-fed + GOS (infant)                                              | 75                    |
| Whole-milk-fed (infant)                                                | 8                     |
| Breast-fed + GOS + FOS (infant)                                        | 3                     |

**Table S2. Cont.**

| <b>Taxonomic identification</b>         | <b>Number of MAGs per diet type considering only <i>Bifidobacterium</i> species</b> |                        |                   |                 |                       |                   |                  |                             |                     |
|-----------------------------------------|-------------------------------------------------------------------------------------|------------------------|-------------------|-----------------|-----------------------|-------------------|------------------|-----------------------------|---------------------|
|                                         | <b>Total</b>                                                                        | <i>B. adolescentis</i> | <i>B. bifidum</i> | <i>B. breve</i> | <i>B. catenulatum</i> | <i>B. dentium</i> | <i>B. longum</i> | <i>B. pseudocatenulatum</i> | <i>B. scardovii</i> |
| Infant formula-fed (infant)             | 64                                                                                  | 0                      | 8                 | 9               | 1                     | 0                 | 32               | 13                          | 1                   |
| Infant formula-fed + GOS (infant)       | 52                                                                                  | 2                      | 5                 | 16              | 0                     | 0                 | 20               | 9                           | 0                   |
| Breast-fed (infant)                     | 31                                                                                  | 0                      | 11                | 7               | 0                     | 0                 | 9                | 4                           | 0                   |
| Infant formula-fed + GOS + FOS (infant) | 17                                                                                  | 5                      | 7                 | 0               | 0                     | 2                 | 2                | 1                           | 0                   |
| Infant formula-fed + FOS (infant)       | 12                                                                                  | 2                      | 0                 | 3               | 0                     | 0                 | 3                | 4                           | 0                   |
| Fiber-rich (adult)                      | 11                                                                                  | 8                      | 0                 | 0               | 0                     | 0                 | 2                | 1                           | 0                   |
| Breast-fed + GOS (infant)               | 11                                                                                  | 0                      | 5                 | 3               | 0                     | 0                 | 2                | 1                           | 0                   |
| Whole-milk-fed (infant)                 | 4                                                                                   | 0                      | 2                 | 0               | 0                     | 0                 | 0                | 2                           | 0                   |
| Breast-fed + GOS + FOS (infant)         | 1                                                                                   | 0                      | 1                 | 0               | 0                     | 0                 | 0                | 0                           | 0                   |

**Table S3.** Glycosidase activities of interest included in selected CAZy families.

| CAZy family | Activities of interest included in the family                                                                                                                                                                                                                                                                                                                                                                                                                                                                  |
|-------------|----------------------------------------------------------------------------------------------------------------------------------------------------------------------------------------------------------------------------------------------------------------------------------------------------------------------------------------------------------------------------------------------------------------------------------------------------------------------------------------------------------------|
| CBM32       | Sialidase                                                                                                                                                                                                                                                                                                                                                                                                                                                                                                      |
| CBM40       | Sialidase                                                                                                                                                                                                                                                                                                                                                                                                                                                                                                      |
| GH1         | $\beta$ -galactosidase                                                                                                                                                                                                                                                                                                                                                                                                                                                                                         |
| GH2         | $\beta$ -galactosidase                                                                                                                                                                                                                                                                                                                                                                                                                                                                                         |
| GH3         | $\beta$ -N-acetylhexosaminidase                                                                                                                                                                                                                                                                                                                                                                                                                                                                                |
| GH4         | $\alpha$ -galactosidase                                                                                                                                                                                                                                                                                                                                                                                                                                                                                        |
| GH5 1       | $\beta$ -N-acetylhexosaminidase                                                                                                                                                                                                                                                                                                                                                                                                                                                                                |
| GH5 2       | $\beta$ -N-acetylhexosaminidase                                                                                                                                                                                                                                                                                                                                                                                                                                                                                |
| GH5 4       | $\beta$ -N-acetylhexosaminidase                                                                                                                                                                                                                                                                                                                                                                                                                                                                                |
| GH5 5       | $\beta$ -N-acetylhexosaminidase                                                                                                                                                                                                                                                                                                                                                                                                                                                                                |
| GH5 7       | $\beta$ -N-acetylhexosaminidase                                                                                                                                                                                                                                                                                                                                                                                                                                                                                |
| GH5 8       | $\beta$ -N-acetylhexosaminidase                                                                                                                                                                                                                                                                                                                                                                                                                                                                                |
| GH5 10      | $\beta$ -N-acetylhexosaminidase                                                                                                                                                                                                                                                                                                                                                                                                                                                                                |
| GH5 13      | $\beta$ -N-acetylhexosaminidase                                                                                                                                                                                                                                                                                                                                                                                                                                                                                |
| GH5 18      | $\beta$ -N-acetylhexosaminidase                                                                                                                                                                                                                                                                                                                                                                                                                                                                                |
| GH5 21      | $\beta$ -N-acetylhexosaminidase                                                                                                                                                                                                                                                                                                                                                                                                                                                                                |
| GH5 22      | $\beta$ -N-acetylhexosaminidase                                                                                                                                                                                                                                                                                                                                                                                                                                                                                |
| GH5 25      | $\beta$ -N-acetylhexosaminidase                                                                                                                                                                                                                                                                                                                                                                                                                                                                                |
| GH5 37      | $\beta$ -N-acetylhexosaminidase                                                                                                                                                                                                                                                                                                                                                                                                                                                                                |
| GH5 38      | $\beta$ -N-acetylhexosaminidase                                                                                                                                                                                                                                                                                                                                                                                                                                                                                |
| GH5 41      | $\beta$ -N-acetylhexosaminidase                                                                                                                                                                                                                                                                                                                                                                                                                                                                                |
| GH5 44      | $\beta$ -N-acetylhexosaminidase                                                                                                                                                                                                                                                                                                                                                                                                                                                                                |
| GH5 46      | $\beta$ -N-acetylhexosaminidase                                                                                                                                                                                                                                                                                                                                                                                                                                                                                |
| GH5 54      | $\beta$ -N-acetylhexosaminidase                                                                                                                                                                                                                                                                                                                                                                                                                                                                                |
| GH16        | endo- $\beta$ -1,4-galactosidase                                                                                                                                                                                                                                                                                                                                                                                                                                                                               |
| GH20        | $\beta$ -hexosaminidase                                                                                                                                                                                                                                                                                                                                                                                                                                                                                        |
| GH29        | $\alpha$ -L-fucosidase ; $\alpha$ -1,3/1,4-L-fucosidase                                                                                                                                                                                                                                                                                                                                                                                                                                                        |
| GH30        | $\beta$ -fucosidase                                                                                                                                                                                                                                                                                                                                                                                                                                                                                            |
| GH30 1      | $\beta$ -fucosidase                                                                                                                                                                                                                                                                                                                                                                                                                                                                                            |
| GH30 2      | $\beta$ -fucosidase                                                                                                                                                                                                                                                                                                                                                                                                                                                                                            |
| GH30 3      | $\beta$ -fucosidase                                                                                                                                                                                                                                                                                                                                                                                                                                                                                            |
| GH30 4      | $\beta$ -fucosidase                                                                                                                                                                                                                                                                                                                                                                                                                                                                                            |
| GH30 5      | $\beta$ -fucosidase                                                                                                                                                                                                                                                                                                                                                                                                                                                                                            |
| GH30 6      | $\beta$ -fucosidase                                                                                                                                                                                                                                                                                                                                                                                                                                                                                            |
| GH30 8      | $\beta$ -fucosidase                                                                                                                                                                                                                                                                                                                                                                                                                                                                                            |
| GH30 9      | $\beta$ -fucosidase                                                                                                                                                                                                                                                                                                                                                                                                                                                                                            |
| GH31        | $\alpha$ -galactosidase                                                                                                                                                                                                                                                                                                                                                                                                                                                                                        |
| GH32        | invertase ; endo-inulinase ; $\beta$ -2,6-fructan 6-levanbiohydrolase ; endo-levanase ; exo-inulinase ; fructan $\beta$ --fructosidase/1-exohydrolase ; fructan $\beta$ --fructosidase/6-exohydrolase ; sucrose:sucrose 1-fructosyltransferase ; fructan:fructan 1-fructosyltransferase ; sucrose:fructan 6-fructosyltransferase ; fructan:fructan 6G-fructosyltransferase ; levan fructosyltransferase ; [retaining] sucrose:sucrose 6-fructosyltransferase ; cycloinulo-oligosaccharide fructanotransferase. |
| GH33        | sialidase ; trans-sialidase                                                                                                                                                                                                                                                                                                                                                                                                                                                                                    |
| GH35        | $\beta$ -galactosidase                                                                                                                                                                                                                                                                                                                                                                                                                                                                                         |
| GH36        | $\alpha$ -galactosidase ; stachyose synthase ; raffinose synthase.                                                                                                                                                                                                                                                                                                                                                                                                                                             |
| GH39        | $\beta$ -galactosidase.                                                                                                                                                                                                                                                                                                                                                                                                                                                                                        |
| GH42        | $\beta$ -galactosidase                                                                                                                                                                                                                                                                                                                                                                                                                                                                                         |
| GH58        | endo-sialidase.                                                                                                                                                                                                                                                                                                                                                                                                                                                                                                |
| GH59        | $\beta$ -galactosidase                                                                                                                                                                                                                                                                                                                                                                                                                                                                                         |
| GH68        | levansucrase ; $\beta$ -fructofuranosidase ; inulosucrase                                                                                                                                                                                                                                                                                                                                                                                                                                                      |
| GH95        | $\alpha$ -L-fucosidase ; $\alpha$ -1,2-L-fucosidase ; $\alpha$ -L-galactosidase                                                                                                                                                                                                                                                                                                                                                                                                                                |
| GH97        | glucoamylase ; $\alpha$ -glucosidase ; $\alpha$ -galactosidase.                                                                                                                                                                                                                                                                                                                                                                                                                                                |
| GH109       | $\beta$ -N-acetylhexosaminidase                                                                                                                                                                                                                                                                                                                                                                                                                                                                                |
| GH110       | $\alpha$ -galactosidase                                                                                                                                                                                                                                                                                                                                                                                                                                                                                        |
| GH139       | $\alpha$ -2-O-Me-L-fucosidase.                                                                                                                                                                                                                                                                                                                                                                                                                                                                                 |
| GH141       | $\alpha$ -L-fucosidase                                                                                                                                                                                                                                                                                                                                                                                                                                                                                         |
| GH147       | $\beta$ -galactosidase                                                                                                                                                                                                                                                                                                                                                                                                                                                                                         |
| GH151       | $\alpha$ -L-fucosidase                                                                                                                                                                                                                                                                                                                                                                                                                                                                                         |

**Table S4.** Sensitivity, specificity, precision, recall, F1 coefficients and balanced accuracy rates for artificial neural network (ANN) random forest (RF) and Generalized Linear Model Elastic-net (GLMNET) computed to classify metagenome-assembled genomes (MAGs) of *B. adolescentis*, *B. bifidum*, *B. breve*, *B. longum* and *B. pseudocatenulatum* based on their glycosidase activities.

| ANN                                      | Sensitivity | Specificity | Precision | Recall | F1   | Balanced accuracy |
|------------------------------------------|-------------|-------------|-----------|--------|------|-------------------|
| <i>Bifidobacterium adolescentis</i>      | 0.63        | 1.00        | 1.00      | 0.63   | 0.77 | 0.81              |
| <i>Bifidobacterium bifidum</i>           | 1.00        | 0.98        | 0.92      | 1.00   | 0.96 | 0.99              |
| <i>Bifidobacterium breve</i>             | 1.00        | 0.98        | 0.91      | 1.00   | 0.95 | 0.99              |
| <i>Bifidobacterium longum</i>            | 0.95        | 0.97        | 0.95      | 0.95   | 0.95 | 0.96              |
| <i>Bifidobacterium pseudocatenulatum</i> | 0.90        | 0.96        | 0.82      | 0.90   | 0.86 | 0.93              |

  

| RF                                       | Sensitivity | Specificity | Precision | Recall | F1   | Balanced accuracy |
|------------------------------------------|-------------|-------------|-----------|--------|------|-------------------|
| <i>Bifidobacterium adolescentis</i>      | 0.71        | 1.00        | 1.00      | 0.71   | 0.83 | 0.86              |
| <i>Bifidobacterium bifidum</i>           | 0.92        | 0.98        | 0.92      | 0.92   | 0.92 | 0.95              |
| <i>Bifidobacterium breve</i>             | 1.00        | 0.98        | 0.91      | 1.00   | 0.95 | 0.99              |
| <i>Bifidobacterium longum</i>            | 0.95        | 0.97        | 0.95      | 0.95   | 0.95 | 0.96              |
| <i>Bifidobacterium pseudocatenulatum</i> | 0.90        | 0.96        | 0.82      | 0.90   | 0.86 | 0.93              |

  

| GLMNET                                   | Sensitivity | Specificity | Precision | Recall | F1   | Balanced accuracy |
|------------------------------------------|-------------|-------------|-----------|--------|------|-------------------|
| <i>Bifidobacterium adolescentis</i>      | 0.71        | 1.00        | 1.00      | 0.71   | 0.83 | 0.86              |
| <i>Bifidobacterium bifidum</i>           | 0.92        | 0.98        | 0.92      | 0.92   | 0.92 | 0.95              |
| <i>Bifidobacterium breve</i>             | 1.00        | 0.98        | 0.91      | 1.00   | 0.95 | 0.99              |
| <i>Bifidobacterium longum</i>            | 0.95        | 0.97        | 0.95      | 0.95   | 0.95 | 0.96              |
| <i>Bifidobacterium pseudocatenulatum</i> | 0.90        | 0.96        | 0.82      | 0.90   | 0.86 | 0.93              |

**Table S5.** Variable importance coefficients of artificial neural network (ANN) computed to classify metagenome-assembled genomes (MAGs) of *B. adolescentis*, *B. bifidum*, *B. breve*, *B. longum* and *B. pseudocatenulatum* based on their glycosidase activities. Importance coefficients were determined by the sum of the product of raw input-hidden and hidden-output connection weights.

| <i>B. adolescentis</i> | Importance (%) | <i>B. bifidum</i> | Importance (%) | <i>B. breve</i> | Importance (%) | <i>B. longum</i> | Importance (%) | <i>B. pseudocatenulatum</i> | Importance (%) |
|------------------------|----------------|-------------------|----------------|-----------------|----------------|------------------|----------------|-----------------------------|----------------|
| GH2                    | 100.0          | GH110             | 100.0          | GH5 18          | 100.0          | GH30 5           | 100.0          | GH5 44                      | 100.0          |
| GH30 2                 | 50.1           | GH20              | 86.5           | GH1             | 75.6           | GH5 18           | 49.2           | GH20                        | 94.7           |
| GH32                   | 47.0           | CBM32             | 82.3           | GH5 44          | 29.6           | GH32             | 22.3           | GH30 2                      | 60.7           |
| GH35                   | 26.3           | GH36              | 57.6           | GH95            | 10.0           | GH20             | 20.2           | GH31                        | 31.5           |
| GH1                    | 21.3           | GH95              | 51.7           | GH31            | 9.4            | GH59             | 12.9           | GH95                        | 10.4           |
| GH31                   | 17.7           | GH1               | 34.1           | GH2             | 7.9            | GH30 9           | 12.9           | GH32                        | 6.0            |
| GH3                    | 15.5           | GH42              | 27.9           | GH59            | 3.0            | GH42             | 8.2            | GH35                        | 3.8            |
| GH36                   | 15.1           | GH59              | 16.0           | GH30 9          | 3.0            | GH31             | 5.8            | GH3                         | 2.1            |
| GH42                   | 11.6           | GH30 9            | 16.0           | GH32            | 1.0            | GH3              | 0.3            | GH5 4                       | 0.0            |
| GH110                  | 8.8            | GH3               | 10.7           | GH5 4           | 0.0            | GH5 4            | 0.0            | GH42                        | -7.1           |
| GH5 44                 | 5.9            | GH35              | 5.6            | GH36            | -3.4           | GH35             | -3.0           | GH1                         | -10.0          |
| CBM32                  | 4.0            | GH5 4             | 0.0            | CBM32           | -13.8          | GH36             | -4.5           | GH30 9                      | -11.6          |
| GH5 4                  | 0.0            | GH30 5            | -12.3          | GH3             | -17.3          | GH95             | -4.5           | GH59                        | -11.6          |
| GH30 5                 | -19.1          | GH2               | -22.6          | GH35            | -18.1          | GH110            | -4.6           | CBM32                       | -19.8          |
| GH59                   | -31.1          | GH30 2            | -57.1          | GH20            | -22.9          | CBM32            | -7.5           | GH110                       | -24.0          |
| GH30 9                 | -31.1          | GH5 18            | -63.8          | GH110           | -26.1          | GH2              | -16.3          | GH36                        | -30.4          |
| GH95                   | -61.5          | GH31              | -117.1         | GH42            | -26.7          | GH30 2           | -16.8          | GH2                         | -38.1          |
| GH5 18                 | -67.9          | GH32              | -139.4         | GH30 2          | -33.5          | GH5 44           | -37.4          | GH30 5                      | -100.5         |
| GH20                   | -219.0         | GH5 44            | -139.8         | GH30 5          | -38.9          | GH1              | -64.9          | GH5 18                      | -108.6         |

**Table S6.** Variable importance coefficients of random forest (RF) computed to classify metagenome-assembled genomes (MAGs) of *B. adolescentis*, *B. bifidum*, *B. breve*, *B. longum* and *B. pseudocatenulatum* based on their glycosidase activities. Importance coefficients were determined by the permutation of the out of-bag-error.

| <i>B. adolescentis</i> | Importance (%) | <i>B. bifidum</i> | Importance (%) | <i>B. breve</i> | Importance (%) | <i>B. longum</i> | Importance (%) | <i>B. pseudocatenulatum</i> | Importance (%) |
|------------------------|----------------|-------------------|----------------|-----------------|----------------|------------------|----------------|-----------------------------|----------------|
| GH20                   | 100.0          | GH32              | 100.0          | GH5 18          | 100.0          | GH30 5           | 100.0          | GH5 18                      | 100.0          |
| GH5 18                 | 41.2           | GH5 44            | 94.6           | GH1             | 89.1           | GH1              | 75.6           | GH30 5                      | 79.8           |
| GH30 5                 | 31.2           | GH5 18            | 68.4           | GH30 5          | 49.8           | GH5 18           | 51.2           | GH5 44                      | 69.7           |
| GH110                  | 18.6           | GH31              | 56.9           | GH95            | 31.0           | GH110            | 33.4           | GH20                        | 68.4           |
| GH95                   | 16.5           | GH30 5            | 56.0           | GH110           | 25.9           | GH32             | 30.1           | GH110                       | 36.1           |
| GH2                    | 14.9           | GH20              | 42.9           | GH5 44          | 24.6           | GH95             | 27.6           | GH30 2                      | 23.1           |
| GH32                   | 6.0            | GH110             | 40.4           | GH32            | 20.5           | GH30 2           | 23.2           | GH31                        | 14.4           |
| CBM32                  | 4.2            | GH30 2            | 26.9           | GH30 2          | 14.4           | GH5 44           | 22.6           | CBM32                       | 10.5           |
| GH31                   | 4.2            | GH35              | 4.7            | GH2             | 9.5            | GH20             | 11.5           | GH36                        | 5.9            |
| GH35                   | 2.5            | CBM32             | 2.7            | CBM32           | 6.3            | GH36             | 10.3           | GH42                        | 4.2            |
| GH3                    | 0.0            | GH1               | 1.4            | GH35            | 4.1            | GH35             | 8.3            | GH30 9                      | 4.2            |
| GH5 4                  | 0.0            | GH5 4             | 0.0            | GH5 4           | 0.0            | CBM32            | 6.8            | GH3                         | 0.0            |
| GH30 9                 | 0.0            | GH30 9            | 0.0            | GH42            | 0.0            | GH30 9           | 5.2            | GH5 4                       | 0.0            |
| GH42                   | 0.0            | GH42              | 0.0            | GH36            | -1.7           | GH2              | 5.0            | GH59                        | 0.0            |
| GH59                   | 0.0            | GH59              | 0.0            | GH3             | -2.1           | GH3              | 3.3            | GH1                         | -0.1           |
| GH5 44                 | -0.4           | GH2               | -1.7           | GH20            | -2.2           | GH59             | 2.3            | GH32                        | -3.1           |
| GH36                   | -0.5           | GH3               | -9.3           | GH31            | -7.4           | GH5 4            | 0.0            | GH2                         | -6.4           |
| GH30 2                 | -3.9           | GH95              | -9.6           | GH30 9          | -8.8           | GH42             | 0.0            | GH95                        | -11.2          |
| GH1                    | -9.3           | GH36              | -10.2          | GH59            | -9.2           | GH31             | -0.7           | GH35                        | -16.8          |



**Table S7.** Variable importance coefficients of Generalized Linear Model Elastic-net (GLMNET) computed to classify metagenome-assembled genomes (MAGs) of *B. adolescentis*, *B. bifidum*, *B. breve*, *B. longum* and *B. pseudocatenulatum* based on their glycosidase activities. Importance coefficients were determined by calculating the area under the ROC (Receiver Operating Characteristic) curve.

| <i>B. adolescentis</i> | Importance (%) | <i>B. bifidum</i> | Importance (%) | <i>B. breve</i> | Importance (%) | <i>B. longum</i> | Importance (%) | <i>B. pseudocatenulatum</i> | Importance (%) |
|------------------------|----------------|-------------------|----------------|-----------------|----------------|------------------|----------------|-----------------------------|----------------|
| GH20                   | 100.0          | GH32              | 100.0          | GH5 18          | 100.0          | GH30 5           | 100.0          | GH5 18                      | 100.0          |
| GH35                   | 28.4           | GH110             | 84.0           | GH1             | 70.1           | GH1              | 53.4           | GH20                        | 96.8           |
| GH30 2                 | 25.2           | GH5 44            | 74.2           | GH20            | 22.0           | GH5 18           | 44.0           | GH30 2                      | 74.1           |
| GH2                    | 23.0           | GH31              | 65.6           | GH5 44          | 18.5           | GH30 2           | 25.6           | GH5 44                      | 73.7           |
| GH5 18                 | 18.6           | CBM32             | 50.9           | GH95            | 16.1           | GH5 44           | 16.3           | GH30 5                      | 31.9           |
| GH95                   | 8.0            | GH42              | 18.1           | GH30 2          | 2.9            | GH2              | 9.3            | GH36                        | 16.8           |
| CBM32                  | 0.0            | GH20              | 8.0            | CBM32           | 0.0            | GH30 9           | 6.1            | GH31                        | 13.5           |
| GH1                    | 0.0            | GH1               | 0.0            | GH2             | 0.0            | GH59             | 5.9            | GH2                         | 13.0           |
| GH3                    | 0.0            | GH2               | 0.0            | GH3             | 0.0            | GH20             | 1.2            | CBM32                       | 0.0            |
| GH5 4                  | 0.0            | GH3               | 0.0            | GH5 4           | 0.0            | GH32             | 1.0            | GH1                         | 0.0            |
| GH5 44                 | 0.0            | GH5 4             | 0.0            | GH30 5          | 0.0            | CBM32            | 0.0            | GH3                         | 0.0            |
| GH30 5                 | 0.0            | GH5 18            | 0.0            | GH30 9          | 0.0            | GH3              | 0.0            | GH5 4                       | 0.0            |
| GH30 9                 | 0.0            | GH30 2            | 0.0            | GH31            | 0.0            | GH5 4            | 0.0            | GH30 9                      | 0.0            |
| GH31                   | 0.0            | GH30 5            | 0.0            | GH32            | 0.0            | GH31             | 0.0            | GH32                        | 0.0            |
| GH32                   | 0.0            | GH30 9            | 0.0            | GH35            | 0.0            | GH35             | 0.0            | GH35                        | 0.0            |
| GH36                   | 0.0            | GH35              | 0.0            | GH36            | 0.0            | GH36             | 0.0            | GH42                        | 0.0            |
| GH42                   | 0.0            | GH36              | 0.0            | GH42            | 0.0            | GH42             | 0.0            | GH59                        | 0.0            |
| GH59                   | 0.0            | GH59              | 0.0            | GH59            | 0.0            | GH95             | 0.0            | GH95                        | 0.0            |
| GH110                  | 0.0            | GH95              | 0.0            | GH110           | 0.0            | GH110            | 0.0            | GH110                       | 0.0            |

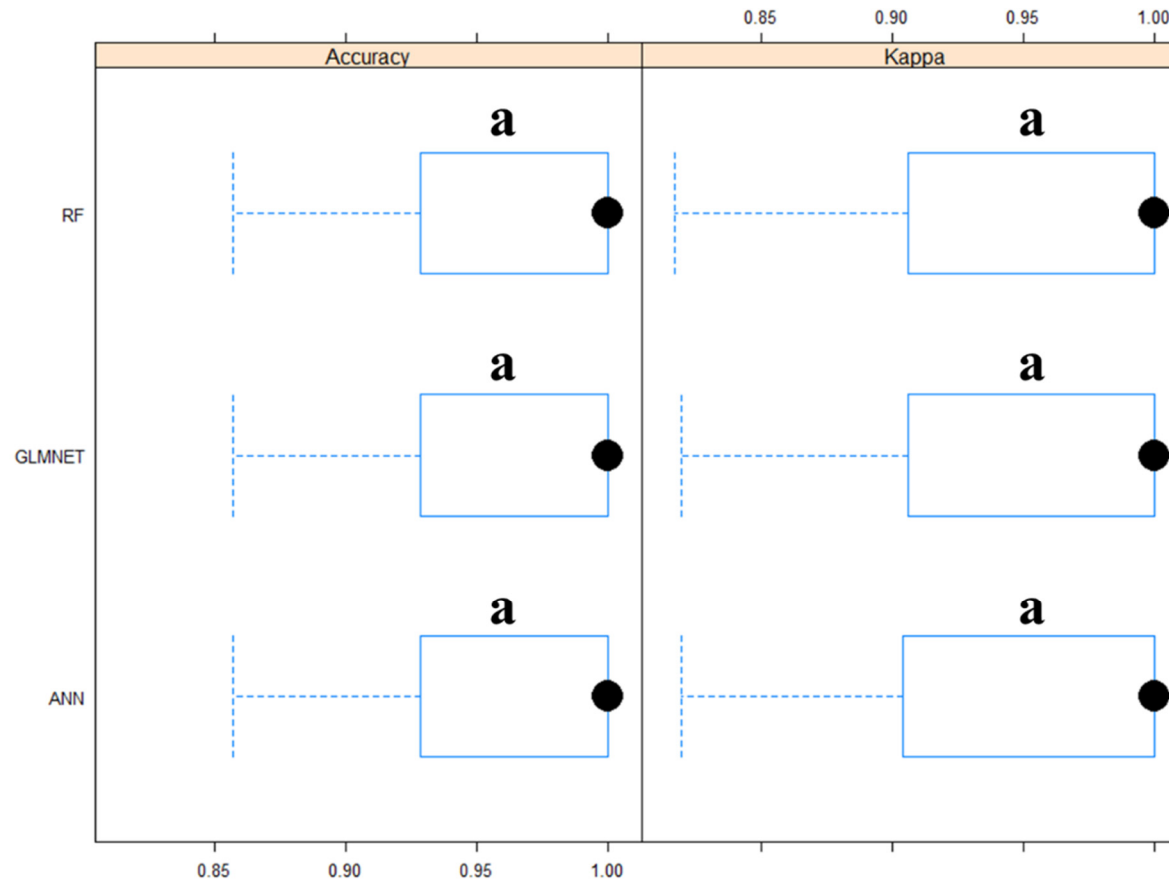

**Figure S1.** Comparative account of different three algorithms used for classification of metagenome-assembled genomes (**MAGs**) of *B. adolescentis*, *B. bifidum*, *B. breve*, *B. longum* and *B. pseudocatenulatum* based on their glycosidase activities: random forest (**RF**), Generalized Linear Model Elastic-net (**GLMNET**) and artificial neural network (**ANN**). Differences between models were calculated via their resampling distributions (number of resamples = 10). <sup>a</sup> No statistically significant ( $p > 0.05$ ) differences between models were found.
